# Supplementary material
Source: publisher site journal article supplement (https://www.dovepress.com/article/576614)
Supplement: Supplementary file 1 [file Supplementary%20Table%20S1.docx]

**Table S1. Comparison of coagulation parameters at sepsis onset and Day 4 of ECMO support in the non-bleeding group**

| **Variable** | **Sepsis-onset [IQR]** | **Non-bleed [IQR]** | **P-value** |
| --- | --- | --- | --- |
| TEG-R | 8.70 [4.85 - 17.57] | 8.09 [4.40 - 11.65] | 0.547 |
| TEG-K | 2.40 [1.18 - 6.03] | 2.60 [1.52 - 4.25] | 0.455 |
| TEG-Alpha | 62.80 [42.45 - 74.72] | 63.00 [51.60 - 74.28] | 0.944 |
| TEG-MA | 59.65 [51.10 - 69.83] | 58.05 [45.53 - 66.10] | 0.552 |
| TEG-CI | -1.80 [-6.70 - 2.30] | -2.30 [-6.30 - 0.60] | 0.588 |
| TEG-EPL | 0.00 [0.00 - 2.70] | 0.00 [0.00 - 1.70] | 0.605 |
| TEG-LY30 | 0.00 [0.00 - 2.70] | 0.00 [0.00 - 1.70] | 0.605 |
| INR | 1.32 [1.21 - 1.71] | 1.27 [1.15 - 1.62] | 0.23 |
| FiB | 3.13 [2.19 - 4.67] | 3.71 [2.21 - 4.99] | 0.316 |
| APTT | 52.60 [39.30 - 72.62] | 47.75 [37.55 - 65.15] | 0.409 |
| TT | 34.65 [18.50 - 131.93] | 26.10 [18.65 - 59.35] | 0.304 |
| PT | 15.35 [14.00 - 19.65] | 14.70 [13.47 - 18.90] | 0.214 |
| D2 | 7756.50 [3748.5 - 19417.8] | 11523.00 [3907.5 - 22586.3] | 0.386 |
| AT-Ⅲ | 58.50 [42.25 - 70.65] | 67.00 [42.85 - 76.85] | 0.477 |
| PLT | 97.50 [53.25 - 153.00] | 72.00 [40.50 - 106.25] | 0.085 |
